# Supplementary material
Source: PubMed Central journal article supplement (PMC7170004)
Supplement: NIHMS1579529-supplement-GeramitaSuppl.pdf [file NIHMS1579529-supplement-GeramitaSuppl.pdf]

**Supplementary Tables, Geramita et al.**

1. Analyses comparing 105 lung transplant recipients participating in the long-term follow-up study to recipients who were alive but did not participate.

Table S1. Characteristics assessed in the original trial or available from medical records during the subsequent long-term follow-up period in study participants and nonparticipants.

| Characteristic                                                                                                       | Study participants (n=105) | Study nonparticipants (n=35) | p value <sup>a</sup> |
|----------------------------------------------------------------------------------------------------------------------|----------------------------|------------------------------|----------------------|
| <b>Baseline sociodemographic and psychosocial factors</b>                                                            |                            |                              |                      |
| Age at transplant, years, M (SD)                                                                                     | 56.1 (13.3)                | 54.6 (13.1)                  | .555                 |
| Sex, % (n) male                                                                                                      | 54.3 (57)                  | 40.0 (14)                    | .143                 |
| Race/ethnicity, % (n)                                                                                                |                            |                              | .290 <sup>b</sup>    |
| Nonhispanic white                                                                                                    | 90.5 (95)                  | 82.9 (29)                    |                      |
| Nonhispanic black                                                                                                    | 8.6 (9)                    | 14.3 (5)                     |                      |
| Hispanic                                                                                                             | 1.0 (1)                    | 2.9 (1)                      |                      |
| Education, ≥ high school, % (n)                                                                                      | 94.3 (99)                  | 94.3 (33)                    | .681 <sup>b</sup>    |
| Marital status at transplant, % married or with significant other                                                    | 69.5 (73)                  | 62.9 (22)                    | .465                 |
| Perceived self-care agency (53=low; 265=high), M (SD)                                                                | 227.0 (24.2)               | 222.9 (20.8)                 | .368                 |
| Locus of control for health (1=low, 6=high), M (SD)                                                                  |                            |                              |                      |
| Internal                                                                                                             | 4.1 (1.0)                  | 4.0 (1.1)                    | .568                 |
| External: due to chance                                                                                              | 3.1 (1.2)                  | 3.3 (1.2)                    | .339                 |
| Social support from family caregiver, low, % (n)                                                                     | 32.4 (34)                  | 44.1 (15)                    | .213                 |
| <b>Baseline transplant-related characteristics</b>                                                                   |                            |                              |                      |
| Transplant indication, % (n)                                                                                         |                            |                              | .943                 |
| Obstructive lung disease (non-α-1-antitrypsin deficiency)                                                            | 35.2 (37)                  | 37.1 (13)                    |                      |
| Pulmonary fibrosis                                                                                                   | 25.7 (27)                  | 28.6 (10)                    |                      |
| Cystic fibrosis                                                                                                      | 15.2 (16)                  | 11.4 (4)                     |                      |
| Other                                                                                                                | 23.8 (25)                  | 22.9 (8)                     |                      |
| Type of lung transplant, % double lung (n) (vs. single lung)                                                         | 90.5 (95)                  | 91.4 (32)                    | .584 <sup>b</sup>    |
| Length of stay after transplant surgery, % (n)                                                                       |                            |                              | .750 <sup>b</sup>    |
| ≤ 2 weeks                                                                                                            | 14.3 (15)                  | 11.4 (4)                     |                      |
| > 2 weeks to 1 month                                                                                                 | 45.7 (48)                  | 54.3 (19)                    |                      |
| > 1 month                                                                                                            | 40.0 (42)                  | 34.3 (12)                    |                      |
| <b>Status during first year after transplant<sup>c</sup></b>                                                         |                            |                              |                      |
| Length of time rehospitalized during year, % (n)                                                                     |                            |                              | .563                 |
| No rehospitalization                                                                                                 | 21.9 (23)                  | 11.4 (4)                     |                      |
| ≤ 2 weeks                                                                                                            | 39.0 (41)                  | 45.7 (16)                    |                      |
| > 2 weeks to 1 month                                                                                                 | 13.3 (14)                  | 17.6 (6)                     |                      |
| > 1 month                                                                                                            | 25.7 (27)                  | 25.7 (9)                     |                      |
| Episodes of grade A2 or greater acute cellular rejection, % (n)                                                      |                            |                              | .529 <sup>b</sup>    |
| None                                                                                                                 | 53.3 (56)                  | 48.6 (17)                    |                      |
| 1 episode                                                                                                            | 32.4 (34)                  | 42.9 (15)                    |                      |
| 2 to 3 episodes                                                                                                      | 14.3 (15)                  | 8.6 (3)                      |                      |
| Anxiety: number out of 3 assessments during the year in which clinically significant symptoms were present, % (n)    | 56.2 (59)                  | 57.1 (20)                    | .926                 |
| 0 assessments                                                                                                        | 20.0 (21)                  | 17.1 (6)                     |                      |
| 1 assessment                                                                                                         | 23.8 (25)                  | 25.7 (9)                     |                      |
| 2-3 assessments                                                                                                      |                            |                              |                      |
| Depression, number out of 3 assessments during the year in which clinically significant symptoms were present, % (n) | 52.4 (55)                  | 45.7 (16)                    | .659                 |
| 0 assessments                                                                                                        | 23.8 (25)                  | 22.9 (8)                     |                      |
| 1 assessment                                                                                                         | 23.8 (25)                  | 31.4 (11)                    |                      |
| 2 to 3 assessments                                                                                                   |                            |                              |                      |

Table S1 continues on next page

| Characteristic                                                        | Study participants (n=105) | Study nonparticipants (n=35) | p value <sup>a</sup> |
|-----------------------------------------------------------------------|----------------------------|------------------------------|----------------------|
| <b>Nonadherence at 12 months posttransplant<sup>d</sup></b>           |                            |                              |                      |
| Primary immunosuppressant medication (missed > once per month), % (n) | 7.9 (8)                    | 6.5 (2)                      | .570 <sup>b</sup>    |
| Nonimmunosuppressant medication (missed > once per month), % (n)      | 14.9 (15)                  | 16.1 (5)                     | .530 <sup>b</sup>    |
| Clinic appointments (missed any visits in past year), % (n)           | 1.0 (1)                    | 3.2 (1)                      | .416 <sup>b</sup>    |
| Spirometry (< several times per week), % (n)                          | 64.4 (65)                  | 71.0 (22)                    | .497                 |
| Monitoring blood pressure (< several times per week), % (n)           | 64.4 (65)                  | 51.6 (16)                    | .202                 |
| Diet (went off diet ≥ occasionally), % (n)                            | 17.8 (18)                  | 9.7 (3)                      | .215 <sup>b</sup>    |
| Exercise (≤ once per week), % (n)                                     | 27.7 (28)                  | 45.2 (14)                    | .068                 |
| Tobacco use (any), % (n)                                              | 1.0 (1)                    | 6.5 (2)                      | .137 <sup>b</sup>    |
| <b>Status after year 1 through time of followup assessment</b>        |                            |                              |                      |
| Episodes of grade A2 or greater acute cellular rejection, % (n)       |                            |                              | .579                 |
| None                                                                  | 69.5 (73)                  | 60.0 (21)                    |                      |
| 1 episode                                                             | 19.0 (20)                  | 25.7 (9)                     |                      |
| 2 to 3 episodes                                                       | 11.4 (12)                  | 14.3 (5)                     |                      |
| BOS, % (n)                                                            | 26.7 (28)                  | 34.3 (12)                    | .388                 |

<sup>a</sup>χ<sup>2</sup> test or t test except as noted.

<sup>b</sup>Exact test due to low expected frequencies in some cells.

<sup>c</sup>Although the presence of BOS was examined for this period, there were no cases in either study group.

<sup>d</sup>n=101 study participants and n=31 nonparticipants. Four cases in each group had missing data on these variables.

- To address issues discussed in the main body of the paper (Discussion section), we conducted post hoc analyses in which we added an interaction term to the regression models to explore whether the anxiety and rejection episode risk factors had synergistic effects on nonadherence outcomes. Results, shown below, indicate no evidence of such impact. Table 4 in the main body of the paper gives coefficients for all other factors included in the regression models.

Table S2. Addition of anxiety x graft rejection episode interaction term to regression analyses examining potential risk factors and correlates of long-term nonadherence, n=101 patients with data from original trial and follow-up assessment.

| Potential risk factors or correlates <sup>a</sup>   | Total No. of Areas of Nonadherence |           | Nonadherence to:   |           |                               |           |                       |           |                           |           |                                      |           |    |        |
|-----------------------------------------------------|------------------------------------|-----------|--------------------|-----------|-------------------------------|-----------|-----------------------|-----------|---------------------------|-----------|--------------------------------------|-----------|----|--------|
|                                                     |                                    |           | Taking medications |           | Attending clinic appointments |           | Performing Spirometry |           | Monitoring blood pressure |           | Following diet/exercise requirements |           |    |        |
|                                                     |                                    |           | β                  | 95% CI    | OR                            | 95% CI    | OR                    | 95% CI    | OR                        | 95% CI    | OR                                   | 95% CI    | OR | 95% CI |
| <b>Stage 4: Interaction effect</b>                  |                                    |           |                    |           |                               |           |                       |           |                           |           |                                      |           |    |        |
| Anxiety x Graft rejection episodes interaction term | .28                                | -.16, .73 | 1.71               | .71, 4.12 | 1.14                          | .56, 2.30 | .73                   | .22, 2.45 | 2.16                      | .79, 5.89 | 1.03                                 | .43, 2.47 |    |        |

<sup>a</sup>See Table 4 in main body of paper for factors entered in Stages 1, 2, and 3. Stage 4 tested the interaction term of anxiety x graft rejection episodes. Thus, for each outcome, the Stage 4 model adjusts for all main effects of the predictors (see Table 4 in the main body of the paper).

Abbreviations: CI, confidence interval; OR, odds ratio.
